# Supplementary material
Source: Research Square preprint supplement (doi:10.21203/rs.3.rs-9670147/v1)
Supplement: Supplementary file 2 [file df14a615a7f70168fc119861.docx]

**Table 1.** Demographic data of participants

| **Mean (SD) or n (%)** | **Total**  **(n = 42)** | **MCI**  **(n = 21)** | **CON**  **(n = 21)** | ***p*-value** |
| --- | --- | --- | --- | --- |
| Age, years | 70.82 (4.46) | 70.81 (4.77) | 70.83 (4.25) | 0.986 |
| Sex, n |  |  |  | 0.710 |
| Female | 33 (78.57) | 16 (76.19) | 17 (80.95) |  |
| Male | 9 (21.43) | 5 (23.81) | 4 (19.05) |  |
| BMI, kg/m² | 22.56 (3.46) | 22.62 (3.28) | 22.50 (3.71) | 0.910 |
| Education, n |  |  |  | 0.931 |
| Elementary school | 5 (11.90) | 3 (14.29) | 2 (9.52) |  |
| High school | 6 (14.29) | 3 (14.29) | 3 (14.29) |  |
| Bachelor's degree | 26 (61.91) | 12 (57.13) | 14 (66.67) |  |
| Postgraduate degree | 5 (11.90) | 3 (14.29) | 2 (9.52) |  |
| Experience with MR technology, n  Never  One-time  More than one time | 35 (83.34)  4 (9.52)  3 (7.14) | 17 (80.96)  2 (9.52)  2 (9.52) | 18 (85.72)  2 (9.52)  1 (4.76) | 0.655 |
| Anxiety, score | 4.64 (3.02) | 5.14 (3.51) | 4.14 (2.41) | 0.289 |
| Depression, score | 3.95 (3.43) | 5.14 (3.81) | 2.76 (2.57) | 0.022* |
| TMSE, score | 28.50 (1.80) | 27.57 (2.04) | 29.43 (0.81) | 0.000* |
| MoCA, score | 25.07 (3.73) | 21.86 (2.24) | 28.29 (1.35) | 0.000* |
| MIS, score | 12.40 (2.46) | 10.67 (2.11) | 14.14 (1.28) | 0.000* |
| CWST, second | 32.16 (5.69) | 35.49 (5.29) | 28.83 (3.91) | 0.000* |
| BBT, n | 67.55 (9.95) | 64.57 (9.87) | 70.52 (9.33) | 0.051 |
| TUG, second | 9.79 (1.74) | 10.30 (1.68) | 9.29 (1.68) | 0.058 |

Note: n = number; BMI = Body Mass Index; MR = Mixed Reality; TMSE = Thai Mental State Examination; MoCA = Montreal Cognitive Assessment; MIS = MoCA Memory Index Score; CWST = Color-Word Stroop test; BBT = Box and Block Test; TUG = Timed Up and Go Test.

**Table 2.** Comparison of usability, intrinsic motivation, and cybersickness in mixed-reality exergames between two groups

| **Variables** | **MCI (n = 21)**  Median (Q1, Q3) | **CON (n = 21)**  Median (Q1, Q3) | ***p*-value** |
| --- | --- | --- | --- |
| Usability | 67.50 (62.50, 75.00) | 70.00 (65.00, 73.75) | 1.000 |
| Intrinsic Motivation  Enjoyment  Perceived competence  Perceived choice  Tension | 6.00 (5.50, 6.43)  5.20 (4.70, 5.60)  6.40 (6.10, 6.40)  1.60 (1.40, 2.60) | 6.00 (5.50, 6.36)  5.00 (4.60, 5.50)  6.40 (6.00, 6.80)  1.80 (1.50, 2.30) | 0.939  0.791  0.422  0.657 |
| Cybersickness  Nausea  Vestibular  Oculomotor  Total | 2.00 (2.00, 4.00)  2.00 (2.00, 3.50)  3.00 (2.00, 4.00)  8.00 (6.00, 10.00) | 2.00 (2.00, 3.00)  2.00 (2.00, 2.50)  3.00 (2.00, 4.00)  8.00 (6.00, 10.00) | 0.312  0.384  0.499  0.717 |

Note: n = number; Q1 = 25th percentile; Q3 = 75th percentile; Mann–Whitney U test was used for all comparisons.
